# Supplementary material for: Luminescence thermochromism in novel mixed Eu(ii)–Cu(i) iodide
Source: Royal Society of Chemistry journal article supplement (doi:10.1039/d1dt02384e), 2021-01-01
Supplement: d1dt02384e1.pdf [file d1dt02384e1.pdf]

## Supplementary Information

### Luminescent Thermochromism in Novel Mixed Eu(II)- Cu(I) Iodide

Vasily A. Ilichev,<sup>\*a</sup> Liubov I. Silantyeva,<sup>a</sup> Anton F. Rogozhin,<sup>a</sup> Artem N. Yablonskiy,<sup>b</sup>  
Boris A. Andreev,<sup>b</sup> Roman V. Rumyantsev,<sup>a</sup> Georgy K. Fukin<sup>a</sup> and Mikhail N.  
Bochkarev<sup>a</sup>

<sup>a</sup> *G. A. Razuvaev Institute of Organometallic Chemistry of Russian Academy of Sciences, Tropinina 49, 603950 Nizhny Novgorod, Russian Federation.*

<sup>b</sup> *Institute for Physics of Microstructures of Russian Academy of Sciences, 7 ul. Akademicheskaya, 603950 Nizhny Novgorod, Russian Federation.*

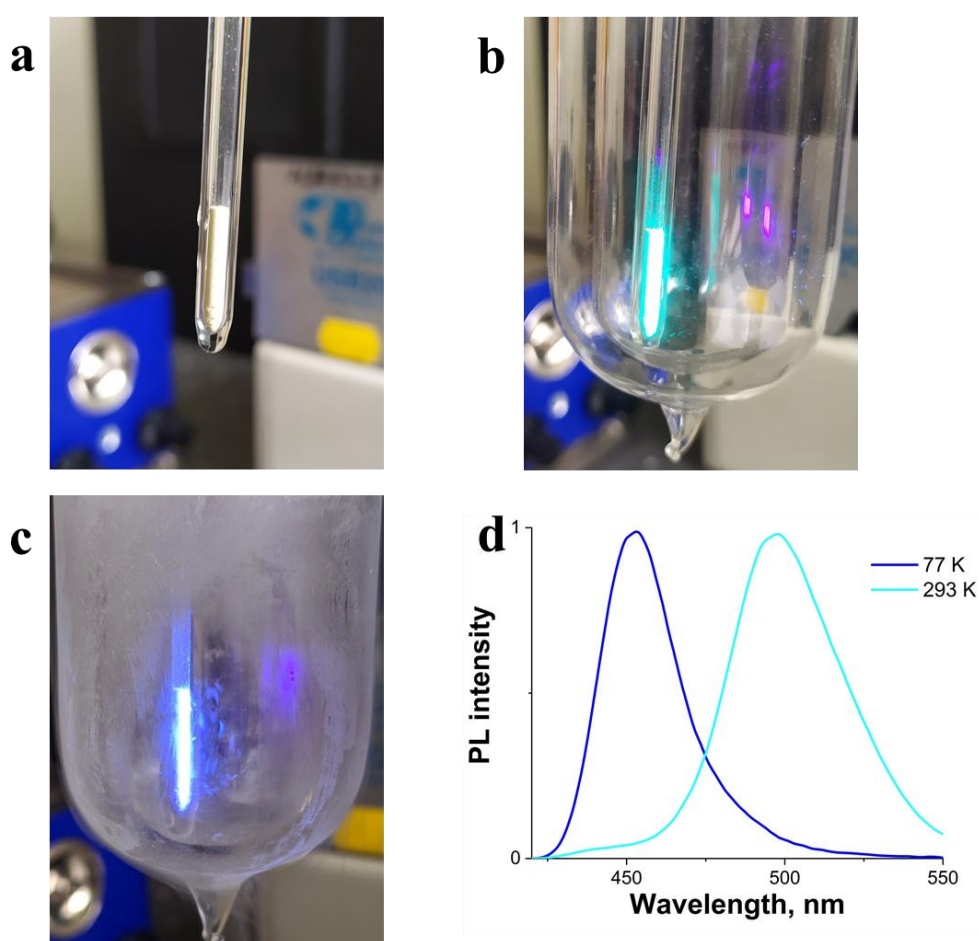

**Figure 1S.** Photo of **1** in evacuated quartz tube (a), under irradiation by 365 nm UV LED at 293 (b) and 77 K (c); PL spectra of **1** at 293 and 77 K (d).

**Table 1S.** Details of crystallographic, collection and refinement data for complex **1** at 100 and 280 K.

| <b>1</b>                                                                    |                                                                                |                     |
|-----------------------------------------------------------------------------|--------------------------------------------------------------------------------|---------------------|
| Empirical formula                                                           | C <sub>16</sub> H <sub>40</sub> Cu <sub>2</sub> Eu <sub>4</sub> O <sub>8</sub> |                     |
| M                                                                           | 1147.12                                                                        |                     |
| T/K                                                                         | 100(2)                                                                         | 280(2)              |
| Crystal system                                                              | Orthorhombic                                                                   |                     |
| Space group                                                                 | <i>Pna2<sub>1</sub></i>                                                        |                     |
| <i>a</i> (Å)                                                                | 15.8800(4)                                                                     | 16.0747(8)          |
| <i>b</i> (Å)                                                                | 12.7849(3)                                                                     | 12.9699(6)          |
| <i>c</i> (Å)                                                                | 16.1773(4)                                                                     | 16.3759(10)         |
| <i>V</i> (Å <sup>3</sup> )                                                  | 3284.40(14)                                                                    | 3414.2(3)           |
| <i>Z</i>                                                                    | 4                                                                              |                     |
| <i>d</i> <sub>calc</sub> (g cm <sup>-3</sup> )                              | 2.320                                                                          | 2.232               |
| M (mm <sup>-1</sup> )                                                       | 6.960                                                                          | 6.695               |
| <i>F</i> (000)                                                              | 2132                                                                           | 2132                |
| Crystal size (mm)                                                           | 0.56 × 0.39 × 0.35                                                             |                     |
| θ (deg)                                                                     | 3.020–30.034                                                                   | 2.982–25.026        |
| Limiting indices                                                            | –22 ≤ <i>h</i> ≤ 22                                                            | –18 ≤ <i>h</i> ≤ 19 |
| <i>h, k, l</i>                                                              | –18 ≤ <i>k</i> ≤ 18                                                            | –15 ≤ <i>k</i> ≤ 15 |
|                                                                             | –22 ≤ <i>l</i> ≤ 22                                                            | –19 ≤ <i>l</i> ≤ 19 |
| Reflections collected / unique                                              | 62458 / 9595                                                                   | 27338 / 5843        |
| <i>R</i> (int)                                                              | 0.0420                                                                         | 0.0691              |
| <i>S</i>                                                                    | 1.034                                                                          | 1.048               |
| <i>R</i> <sub>1</sub> / <i>wR</i> <sub>2</sub> ( <i>I</i> > 2σ( <i>I</i> )) | 0.0475 / 0.1151                                                                | 0.0480 / 0.1052     |
| <i>R</i> <sub>1</sub> / <i>wR</i> <sub>2</sub> (all data)                   | 0.0515 / 0.1180                                                                | 0.0655 / 0.1153     |
| Absolute structure parameter                                                | –0.01(3)                                                                       | –0.03(2)            |
| Largest diff. peak / hole (e <sup>-</sup> Å <sup>-3</sup> )                 | 1.855 / –1.176                                                                 | 1.147 / –1.196      |

**Table 2S.** Selected Bond Distances (Å) and Angles (deg) for compound **1** at 100 and 280 K.

| Lengths (Å) /<br>Angles (deg) | <b>1</b>  |            |
|-------------------------------|-----------|------------|
|                               | 100 K     | 280 K      |
| Eu(1)-O(1)                    | 2.64(2)   | 2.63(3)    |
| Eu(1)-O(2)                    | 2.59(4)   | 2.58(3)    |
| Eu(1)-O(3)                    | 2.567(7)  | 2.599(11)  |
| Eu(1)-O(4)                    | 2.608(8)  | 2.609(11)  |
| Eu(1)-O(5)                    | 2.549(7)  | 2.579(11)  |
| Eu(1)-O(6)                    | 2.577(7)  | 2.582(11)  |
| Eu(1)-O(7)                    | 2.57(7)   | 2.61(3)    |
| Eu(1)-O(8)                    | 2.63(4)   | 2.63(3)    |
| Cu(1)-I(1)                    | 2.494(2)  | 2.495(4)   |
| Cu(1)-I(2)                    | 2.608(2)  | 2.610(3)   |
| Cu(1)-I(3)                    | 2.580(2)  | 2.596(4)   |
| Cu(1)···Cu(2)                 | 2.617(2)  | 2.653(4)   |
| Cu(2)-I(2)                    | 2.568(2)  | 2.583(3)   |
| Cu(2)-I(3)                    | 2.569(2)  | 2.563(3)   |
| Cu(2)-I(4)                    | 2.489(2)  | 2.485(4)   |
| O(2)-Eu(1)-O(1)               | 62.2(7)   | 64.0(8)    |
| O(3)-Eu(1)-O(1)               | 107.3(5)  | 106.9(7)   |
| O(4)-Eu(1)-O(1)               | 163.0(6)  | 162.5(7)   |
| O(5)-Eu(1)-O(1)               | 74.5(5)   | 74.6(6)    |
| O(6)-Eu(1)-O(1)               | 101.4(5)  | 100.5(7)   |
| O(7)-Eu(1)-O(1)               | 75.8(15)  | 73.3(11)   |
| O(8)-Eu(1)-O(1)               | 119.1(9)  | 120.6(9)   |
| O(3)-Eu(1)-O(2)               | 73.5(8)   | 73.1(8)    |
| O(2)-Eu(1)-O(4)               | 122.7(7)  | 121.4(7)   |
| O(5)-Eu(1)-O(2)               | 116.3(7)  | 118.4(8)   |
| O(6)-Eu(1)-O(2)               | 161.1(7)  | 160.9(8)   |
| O(7)-Eu(1)-O(2)               | 91.0(16)  | 90.8(11)   |
| O(2)-Eu(1)-O(8)               | 76.3(10)  | 76.7(11)   |
| O(3)-Eu(1)-O(4)               | 62.7(2)   | 62.8(3)    |
| O(5)-Eu(1)-O(3)               | 78.0(3)   | 78.2(4)    |
| O(3)-Eu(1)-O(6)               | 123.0(3)  | 124.2(4)   |
| O(3)-Eu(1)-O(7)               | 159.3(12) | 161.1(7)   |
| O(3)-Eu(1)-O(8)               | 100.5(7)  | 101.7(7)   |
| O(5)-Eu(1)-O(4)               | 89.5(3)   | 89.0(4)    |
| O(6)-Eu(1)-O(4)               | 75.8(3)   | 76.9(4)    |
| O(7)-Eu(1)-O(4)               | 118.6(14) | 121.3(9)   |
| O(4)-Eu(1)-O(8)               | 77.4(7)   | 76.5(7)    |
| O(5)-Eu(1)-O(6)               | 63.7(2)   | 63.5(4)    |
| O(5)-Eu(1)-O(7)               | 121.9(11) | 119.1(6)   |
| O(5)-Eu(1)-O(8)               | 165.7(7)  | 163.4(8)   |
| O(7)-Eu(1)-O(6)               | 75.0(13)  | 73.3(8)    |
| O(6)-Eu(1)-O(8)               | 106.9(7)  | 104.6(8)   |
| O(7)-Eu(1)-O(8)               | 61.8(13)  | 64.2(8)    |
| I(1)-Cu(1)-I(2)               | 122.82(8) | 122.64(15) |
| I(1)-Cu(1)-I(3)               | 123.38(7) | 124.09(13) |
| I(3)-Cu(1)-I(2)               | 113.76(7) | 113.26(13) |

|                  |           |            |
|------------------|-----------|------------|
| I(1)-Cu(1)-Cu(2) | 161.98(8) | 162.30(13) |
| I(2)-Cu(1)-Cu(2) | 58.88(5)  | 58.77(10)  |
| I(3)-Cu(1)-Cu(2) | 59.24(6)  | 58.46(10)  |
| I(2)-Cu(2)-I(3)  | 115.51(7) | 115.29(13) |
| I(4)-Cu(2)-I(2)  | 125.27(7) | 124.37(12) |
| I(4)-Cu(2)-I(3)  | 119.18(7) | 120.31(14) |
| I(2)-Cu(2)-Cu(1) | 60.38(6)  | 59.78(10)  |
| I(3)-Cu(2)-Cu(1) | 59.65(6)  | 59.65(11)  |
| I(4)-Cu(2)-Cu(1) | 160.92(8) | 161.79(12) |
| Cu(2)-I(2)-Cu(1) | 60.75(6)  | 61.45(11)  |
| Cu(2)-I(3)-Cu(1) | 61.10(5)  | 61.90(10)  |

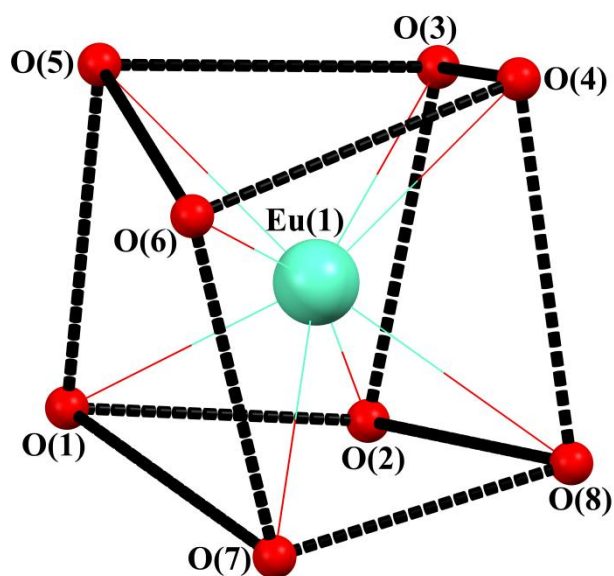

**Figure 2S.** The coordination environment of europium atom in complex **1** at 100 K.

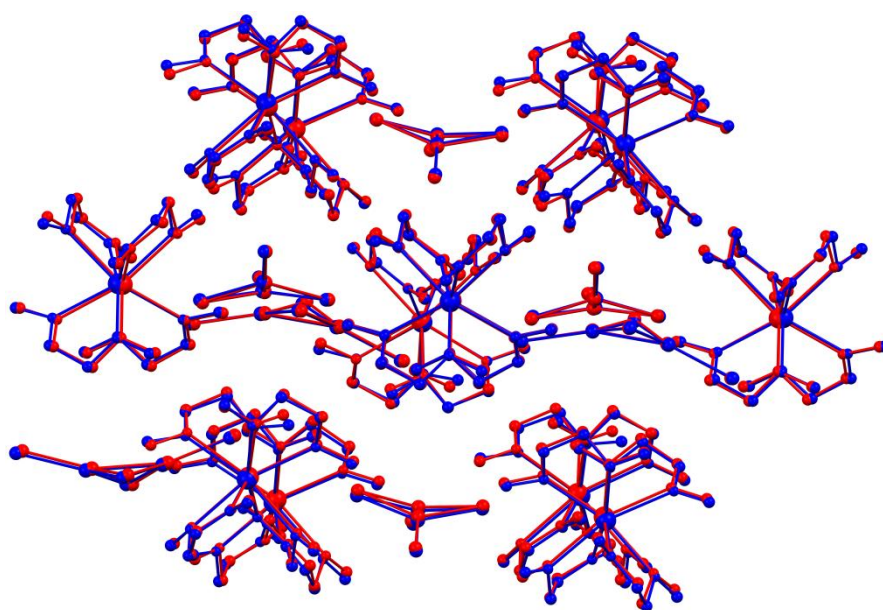

**Figure 3S.** The comparison of crystal packing of complex **1** at 100 (red) and 280 K (blue).

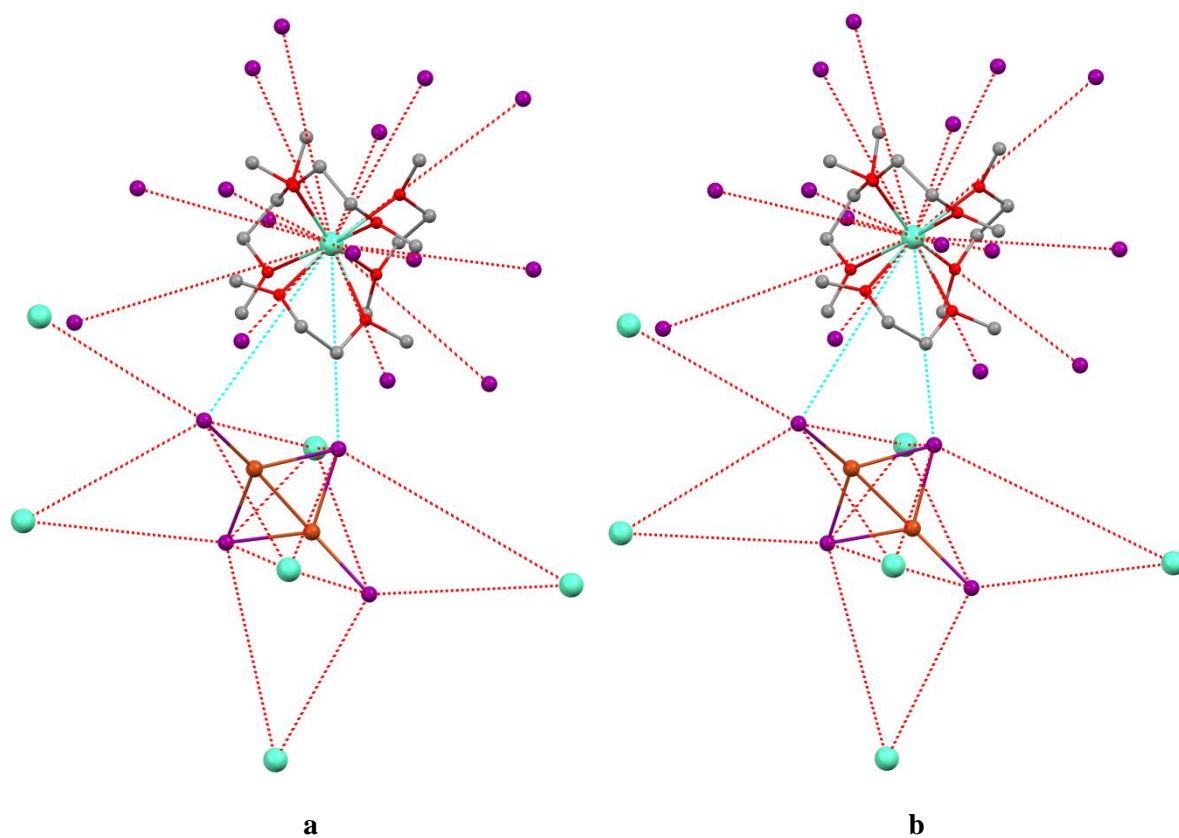

**Figure 4S.** Intermolecular Eu...I distances in complex **1** at 100 (a) and 280 K (b).

**Table 3S.** Intermolecular Eu...I and H...I distances in complex **1** at 100 and 280 K.

| Lengths (Å)   | 100 K | 280 K |
|---------------|-------|-------|
| Eu(1)···I(1)  | 6.408 | 6.501 |
| Eu(1)···I(1A) | 6.486 | 6.564 |
| Eu(1)···I(1B) | 6.618 | 6.668 |
| Eu(1)···I(1C) | 7.597 | 7.781 |
| Eu(1)···I(1D) | 8.823 | 8.877 |
| Eu(1)···I(2A) | 5.974 | 6.121 |
| Eu(1)···I(2B) | 6.728 | 6.774 |
| Eu(1)···I(2C) | 6.958 | 7.037 |
| Eu(1)···I(2D) | 7.003 | 7.102 |
| Eu(1)···I(3)  | 6.192 | 6.326 |
| Eu(1)···I(3A) | 6.257 | 6.406 |
| Eu(1)···I(3B) | 7.145 | 7.183 |
| Eu(1)···I(3C) | 7.910 | 7.903 |
| Eu(1)···I(4A) | 5.928 | 6.021 |
| Eu(1)···I(4B) | 6.275 | 6.307 |
| Eu(1)···I(4C) | 6.691 | 6.819 |
| Eu(1)···I(4D) | 7.568 | 7.666 |
| H(2A)···I(4)  | 2.999 | 3.249 |
| H(5C)···I(4)  | 3.166 | 3.197 |
| H(15A)···I(2) | 3.132 | 3.265 |
| H(6A)···I(1)  | 3.163 | 3.210 |
| H(4B)···I(3)  | 3.153 | 3.269 |

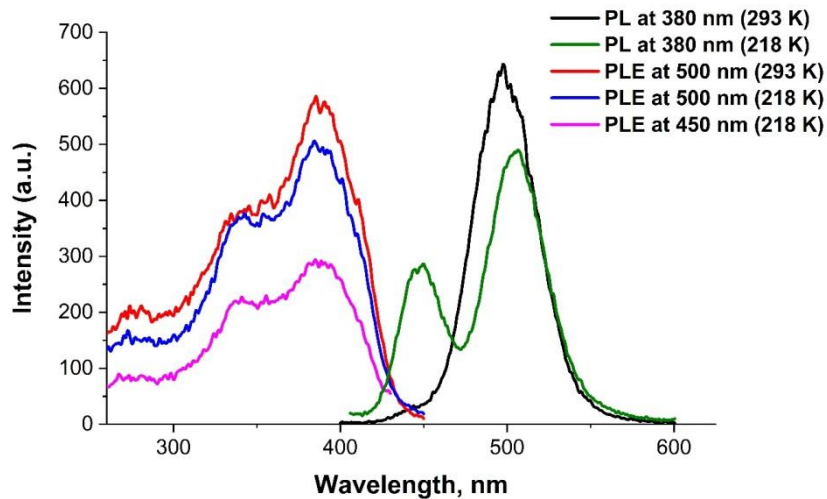

**Figure 5S.** PL and PLE spectra of **1** at various emission wavelengths and temperatures.

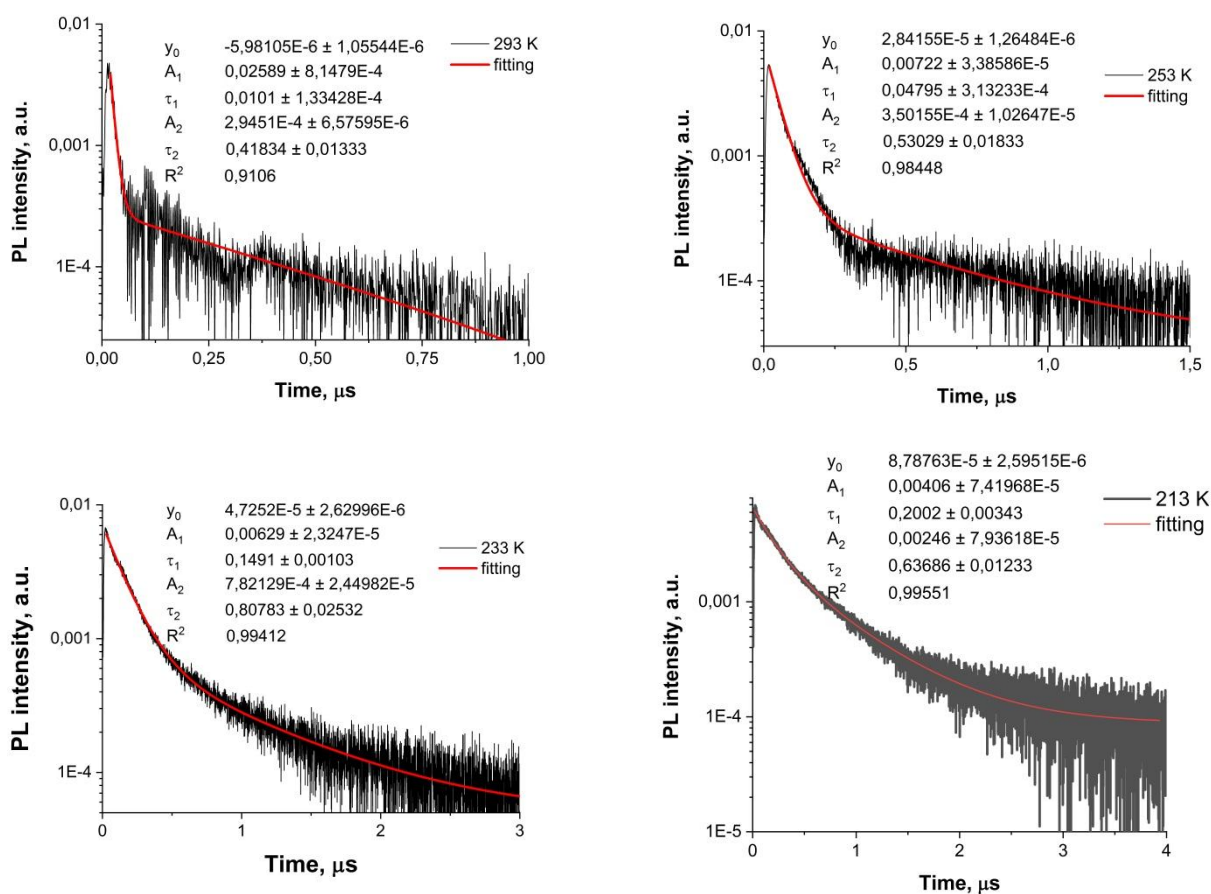

**Figure 6S.** PL kinetics of **1** at 445 nm at various temperatures and their fittings by equation  $y(t) = A_1 \cdot \exp(-t/\tau_1) + A_2 \cdot \exp(-t/\tau_2) + y_0$ .

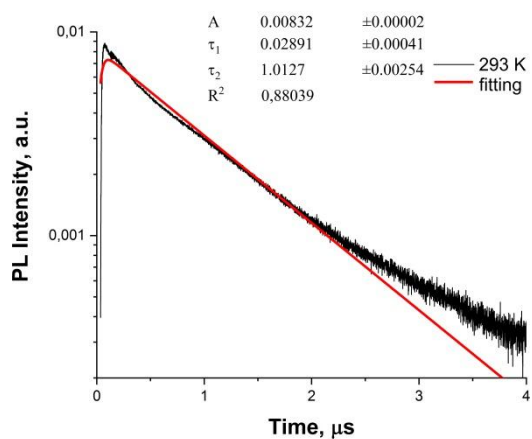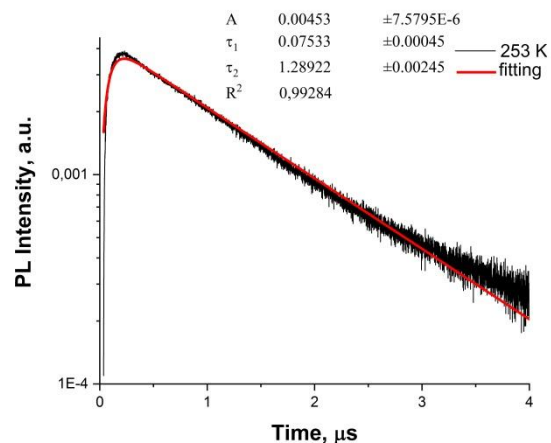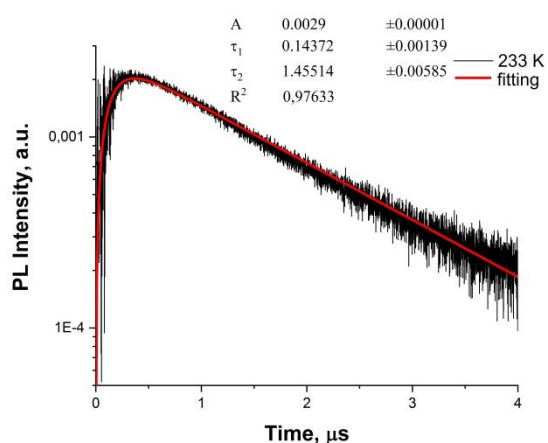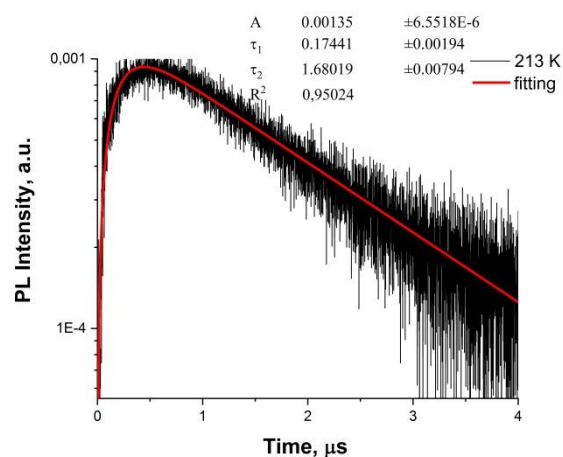

**Figure 7S.** PL kinetics of **1** at 500 nm at various temperatures and their fittings by equation  $y(t) = A \cdot (\exp(-t/\tau_2) - \exp(-t/\tau_1))$

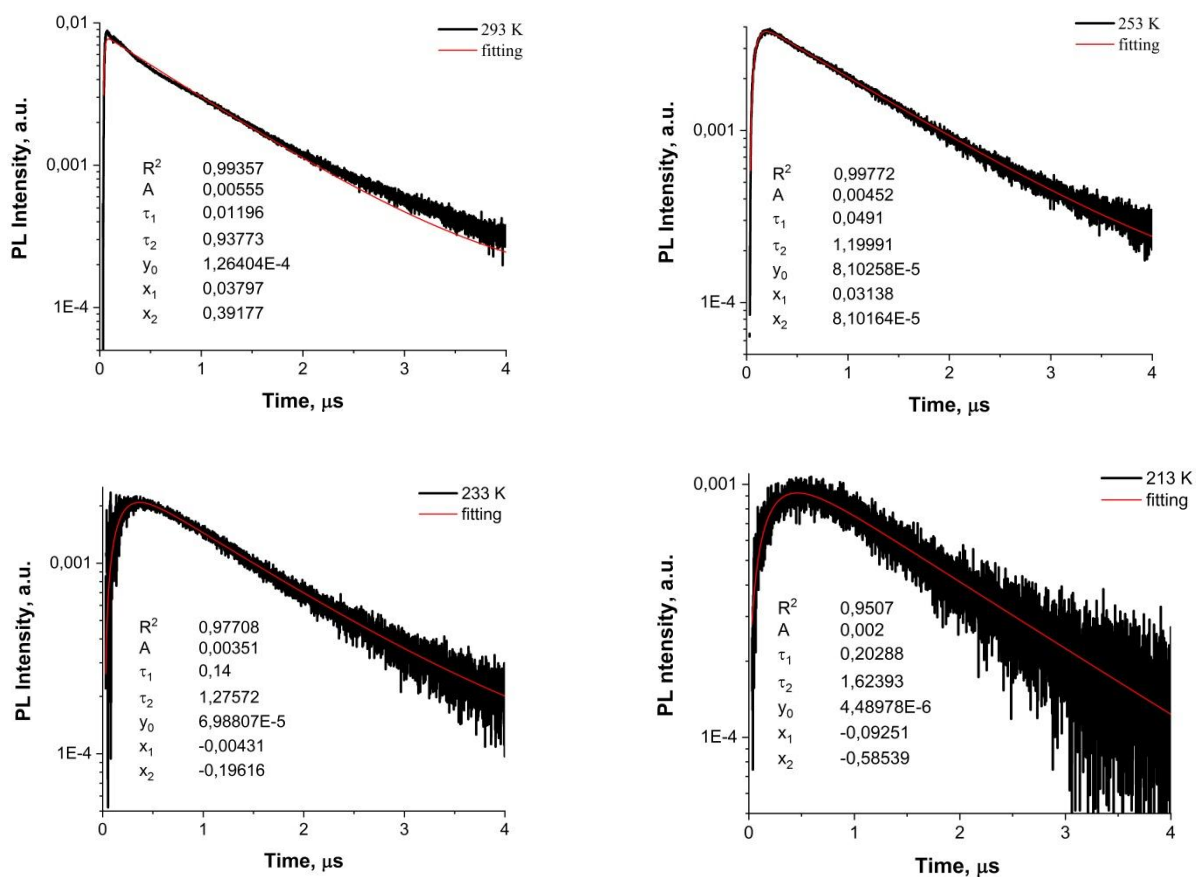

**Figure 8S.** PL kinetics of **1** at 500 nm at various temperatures and their fittings by equation

$$y(t) = A * (\exp(-(t-x_2)/\tau_2) - \exp(-(t-x_1)/\tau_1)) + y_0.$$

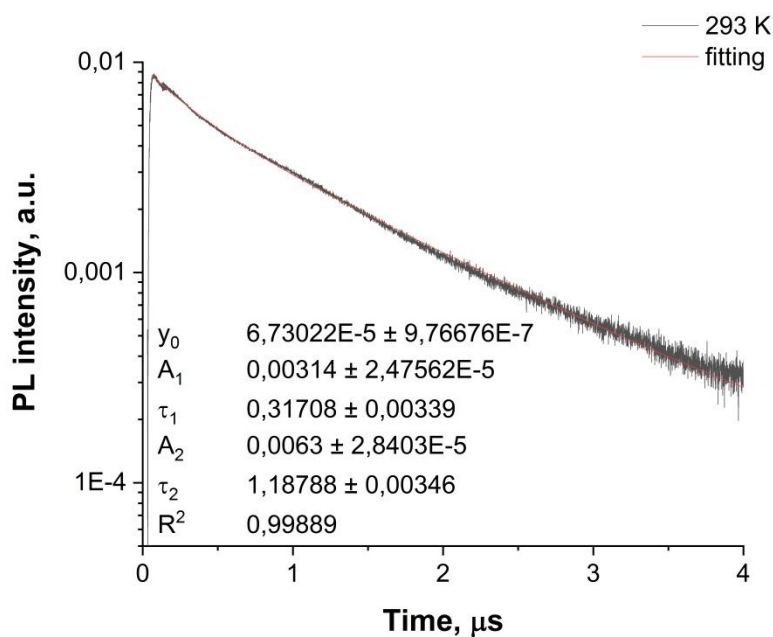

**Figure 9S.** PL kinetic of **1** at 500 nm at 293 K and its fitting by equation

$$y(t) = A_1 * \exp(-t/\tau_1) + A_2 * \exp(-t/\tau_2) + y_0.$$
